# Supplementary material
Source: publisher figshare collection journal article supplement (https://karger.figshare.com/ndownloader/files/30626523)
Supplement: Supplementary file 1 [file 30626523]

## Supplementary File 6: Checklist items for babies undergoing LISA

| Item | Confirmed? |
| --- | --- |
| Procedure started/completed times |  |
| CPAP pressure or HF rate and FiO2 optimised to within SpO2 targets |  |
| Necessary equipment gathered and prepared |  |
| Thermal and comfort care |  |
| ‘Time out’ performed |  |
| Patient’s head positioned properly |  |
| Laryngoscope blade positioned properly |  |
| LISA catheter inserted to appropriate depth |  |
| LISA catheter placement verified (if video laryngoscope available) |  |
| Surfactant administered correctly* |  |
| Drug chart written with dosages checked |  |
| Required drugs are available |  |
| Baseline observations performed |  |
| X-ray post-procedure to assess lung condition |  |
| Naso/oro-gastric tube placed |  |
| Discuss the plan to administer surfactant with parents soon after NICU admission to give them enough time to make an informed decision |  |

*Verified via an observed improvement in O2 requirement or through negative confirmation showing surfactant being aspirated from the stomach.
CPAP, continuous positive airway pressure; FiO2, fraction of inspired oxygen; HF, heart failure;
NICU, neonatal intensive care unit; SpO2, oxygen saturation in blood.
